# Supplementary material
Source: PubMed Central journal article supplement (PMC8550487)
Supplement: i1537-2073-23-5-213_s01.pdf [file i1537-2073-23-5-213_s01.pdf]

**Table S1. Summary of studies**

| Study                                | Design             | N       |                         | Participant Characteristics                    | Age (years)                  | Disease Duration (years)   | EDSS Score                  | Intervention             | Study Duration                         | Outcomes   | Level of Evidence |
|--------------------------------------|--------------------|---------|-------------------------|------------------------------------------------|------------------------------|----------------------------|-----------------------------|--------------------------|----------------------------------------|------------|-------------------|
|                                      |                    | Control | Experimental            |                                                |                              |                            |                             |                          |                                        |            |                   |
| Ahmadi et al <sup>33</sup>           | RCT                | 10      | 11                      | Females with MS                                | 34.35 +/- 9.05               | 4.85 +/- 4.47              | 2.11 +/- 1.15               | Yoga                     | 8 weeks                                | MSQOL-54   | 2b                |
| Alexander et al <sup>36</sup>        | RCT                | 10      | 10                      | Females with MS*                               | 46.7 +/- 8.7                 | 13.7 +/- 7.7               | -                           | CVSD, V                  | 12 weeks                               | FSFI, FSDS | 2b                |
| Foley et al <sup>38</sup>            | Quasi-experimental | 18      | 18                      | Nine couples, one partner with diagnosis of MS | 45.7 (9.9)                   | -                          | 4.70 (2.46)                 | Counseling               | 12 weeks                               | MAT, MSI   | 2b                |
| Lúcio et al <sup>31</sup>            | RCT                |         | G1: 6<br>G2: 7<br>G3: 7 | Females with RRMS                              | G1: 44.5<br>G2: 47<br>G3: 47 | G1: 15<br>G2: 12<br>G3: 11 | G1: 3.5<br>G2: 4.5<br>G3: 4 | PFMT, NMES, TTNS         | 12 weeks                               | FSFI       | 2b                |
| Mosalanejad et al <sup>37</sup>      | RCT                | 23, 23  | 24                      | Married females with MS in remission           | 35.7 (6.5)                   | 4.89 +/- 3.16              | -                           | PFMT, mindfulness        | 8 week intervention, 12 week follow-up | FSFI       | 1b                |
| Najafidoulatabad et al <sup>34</sup> | RCT                | 30      | 30                      | Females with MS                                | 31.6 +/- 8                   | -                          | -                           | Yoga                     | 12 weeks                               | SS Likert  | 1b                |
| Sutherland et al <sup>35</sup>       | RCT                | 11      | 11                      | Males and females with MS                      | 46.32 +/- 4.9                | 10.77 +/- 6.88             | <5                          | Aquatic aerobic exercise | 10 weeks                               | MSQOL-54   | 2b                |
| Hocaloski et al <sup>39</sup>        | Cohort study       | -       | 7                       | Females with MS or SCI^                        | 47.9 (11.2)                  | 2.5-42                     | -                           | Counseling               | 10 weeks                               | FSFI, FSDS | 2b                |

Abbreviations: **CVSD**: clitoral vacuum suction device, **EDSS**: Expanded Disability Status Scale, **FSDS**: Female Sexual Distress Scale, **FSFI**: Female Sexual Function Index, **MS**: multiple sclerosis, **MSI**: Marital Satisfaction Inventory, **MSQOL-54**: Multiple Sclerosis Quality of Life-54, **NMES**: neuromuscular electrical stimulation, **PFMT**: pelvic floor muscle training, **RCT**: randomized controlled trial, **RRMS**: relapsing-remitting multiple sclerosis, **SCI**: spinal cord injury, **SS**: sexual satisfaction, **TTNS**: transcutaneous tibial nerve stimulation, **V**: vibration

\* Study also included individuals with spinal cord injury but this review only uses data reported for participants with MS

^Six out seven participants had diagnosis of MS

**Table S2. Summary of between-group comparison with effect sizes and 95% CIs**

| Outcome                    | Study (outcome measure)         | Experimental       | Control           | Post-test experimental |               | Post-test control |              | Effect Size (SE)   | 95% CI              |
|----------------------------|---------------------------------|--------------------|-------------------|------------------------|---------------|-------------------|--------------|--------------------|---------------------|
|                            |                                 |                    |                   | n                      | Mean (SD)     | n                 | Mean (SD)    |                    |                     |
| <b>Sexual Function</b>     | Ahmadi (MSQOL-54)               | yoga               | wait-list control | 11                     | 75.75 (32.8)  | 10                | 85.01 (17.9) | -0.35 (0.44)       | -1.21 to 0.52       |
|                            | Alexander (FSFI)                | CVSD               | V                 | 9                      | 28.2 (7.25)   | 10                | 23.16 (5.02) | 0.82 (0.48)        | -0.12 to 1.76       |
|                            | Lucio (FSFI)                    | PFMT +NMES         | PFMT + NMES sham  | 7                      | 29.5 (6.37)*  | 6                 | 24.6 (14.44) | 0.45 (0.56)        | -0.65 to 1.56       |
|                            | Lucio (FSFI)                    | PFMT + TTNS        | PFMT + NMES sham  | 7                      | 24.9 (7.19)*  | 6                 | 24.6 (14.44) | 0.03 (0.56)        | -1.06 to 1.12       |
|                            | Mosalanejad (FSFI)              | PFMT + mindfulness | PFMT              | 24                     | 25.3 (5.4)    | 23                | 23.7 (5.1)   | 0.30 (0.29)        | -0.27 to 0.88       |
|                            | Mosalanejad (FSFI)              | PFMT + mindfulness | mindfulness       | 24                     | 25.3 (5.4)    | 23                | 26.9 (4.8)   | -0.31 (0.29)       | -0.89 to 0.26       |
|                            | Sutherland (MSQOL-54)           | aerobic exercise   | no intervention   | 11                     | 10.9 (3.8)    | 11                | 10.7 (4.0)   | 0.05 (0.43)        | -0.78 to 0.89       |
|                            | <b>Grand Effect Size</b>        |                    |                   |                        |               |                   |              |                    | <b>0.08 (0.15)</b>  |
| <b>Sexual Satisfaction</b> | Ahmadi (MSQOL-54)               | yoga               | wait-list control | 11                     | 77.27 (26.11) | 10                | 80 (22.97)   | -0.11 (0.44)       | -0.97 to 0.75       |
|                            | Alexander (FSFI)                | CVSD               | V                 | 9                      | 4.8 (1.48)    | 9                 | 4.24 (1.23)  | 0.41 (0.48)        | -0.52 to 1.35       |
|                            | Foley (MSI)                     | Counseling         | wait-list control | 9                      | 16.17 (5.01)  | 9                 | 13.22 (4.21) | 0.64 (0.48)        | -0.31 to 1.58       |
|                            | Lucio (FSFI)                    | PFMT + NMES        | PFMT + NMES sham  | 7                      | 6 (0.74)*     | 6                 | 5.0 (2.22)   | 0.59 (0.57)        | -0.53 to 1.70       |
|                            | Lucio (FSFI)                    | PFMT + TTNS        | PFMT + NMES sham  | 7                      | 5 (1.48)*     | 6                 | 5.0 (2.22)   | 0.0 (0.56)         | -1.09 to 1.09       |
|                            | Mosalanejad (FSFI)              | PFMT + mindfulness | PFMT              | 24                     | 4.7 (1.7)     | 23                | 4.2 (1.5)    | 0.31 (0.29)        | -0.26 to 0.89       |
|                            | Mosalanejad (FSFI)              | PFMT + mindfulness | mindfulness       | 24                     | 4.7 (1.7)     | 23                | 4.7 (1.7)    | 0.0 (0.29)         | -0.57 to 0.57       |
|                            | Najafidoulatabad (Likert scale) | yoga               | no intervention   | 30                     | 1.4 (1.5)     | 30                | 21. (1.2)    | 0.20 (0.26)^       | 0.0 to 1.03         |
| <b>Grand Effect Size</b>   |                                 |                    |                   |                        |               |                   |              | <b>0.29 (0.13)</b> | <b>0.03 to 0.55</b> |
| <b>Emotional Wellbeing</b> | Ahmadi (MSQOL-54)               | yoga               | wait-list control | 11                     | 66.36 (19.15) | 10                | 57.2 (19.41) | 0.48 (0.44)        | -0.39 to 1.34       |
|                            | Sutherland (MSQOL-54)           | aerobic exercise   | no intervention   | 11                     | 22.4 (4.1)    | 11                | 20.8 (6.7)   | 0.29 (0.43)        | -0.55 to 1.13       |
|                            | <b>Grand Effect Size</b>        |                    |                   |                        |               |                   |              |                    | <b>0.38 (0.31)</b>  |

Abbreviations: **CBT**: cognitive behavior therapy, **CVSD**: clitoral vacuum suction device, **FSFI**: Female Sexual Function Inventory, **NMES**: neuromuscular electrical stimulation, **MSI**: Marital Satisfaction Inventory, **MSQOL-54**: Multiple Sclerosis Quality of Life-54, **PFMT**: pelvic floor muscle therapy, **TTNS**: transcutaneous tibial nerve stimulation, **V**: vibratory stimulation

\*Mean and SD not reported. Median and interquartile range were used to estimate mean and SD for meta-analysis purposes.

^Likert scale where 1 = very satisfied and 5 = very unsatisfied. Effect size sign reversed for consistency. Higher effect size demonstrates improvement.

**Figure S1. Forest plot of within-group individual and grand effects with 95% confidence intervals for A) sexual function, B) sexual satisfaction, and C) emotional well-being**

A)

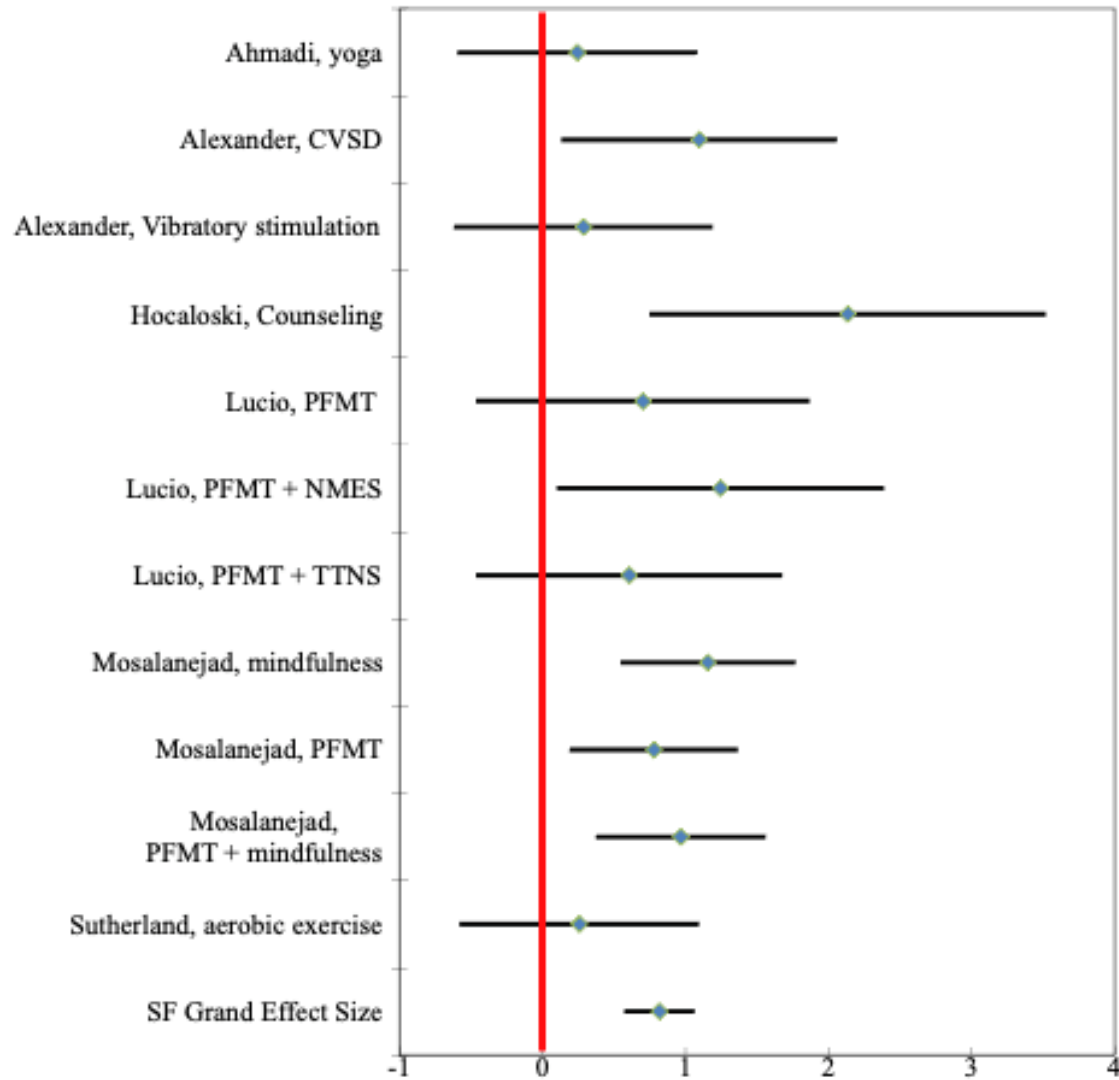

B)

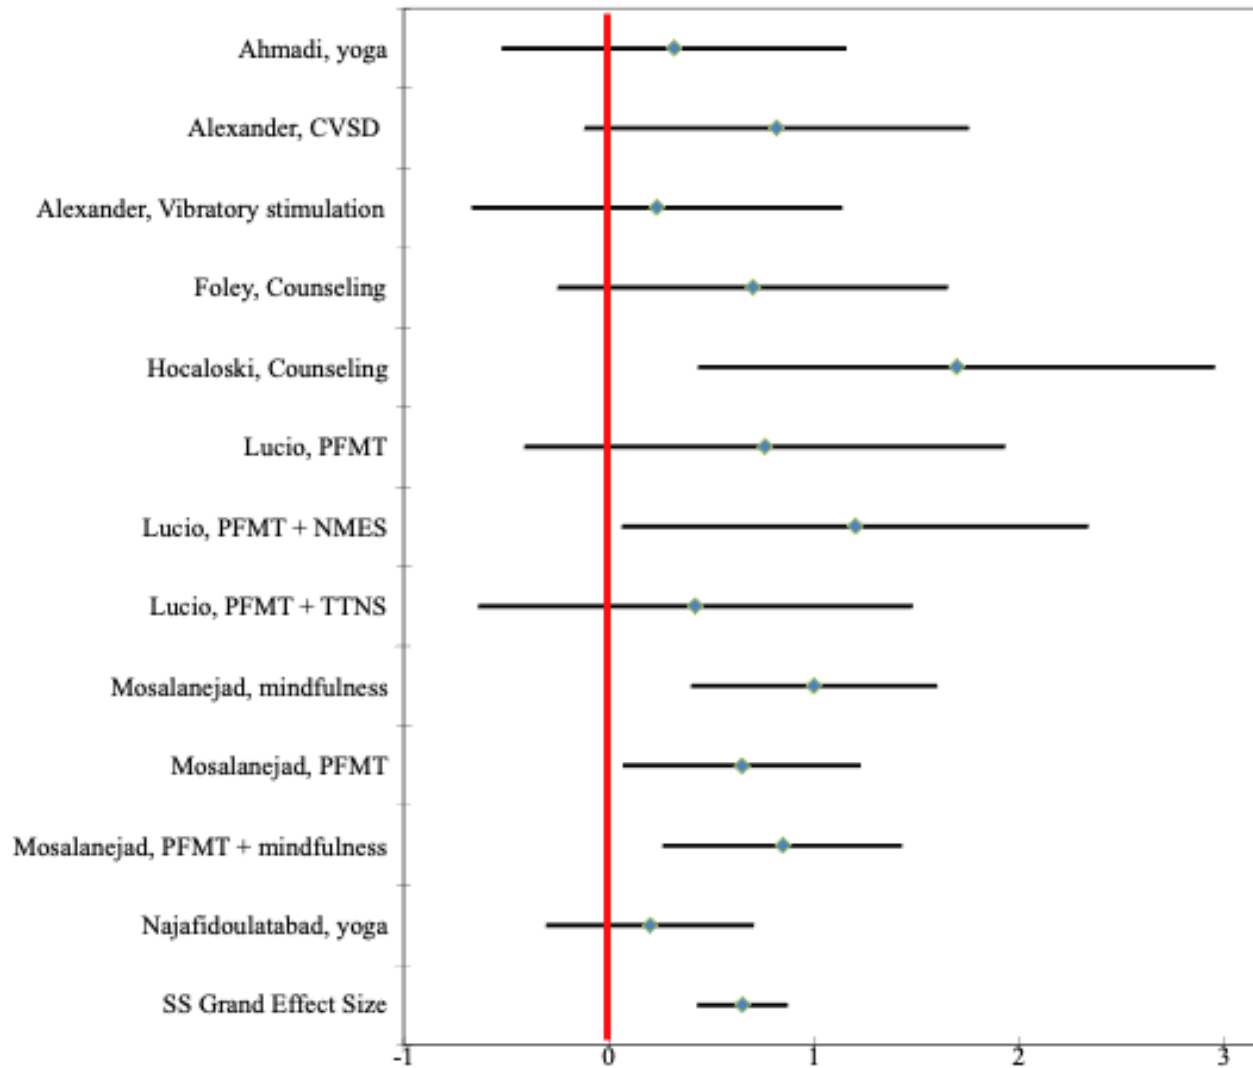

C)

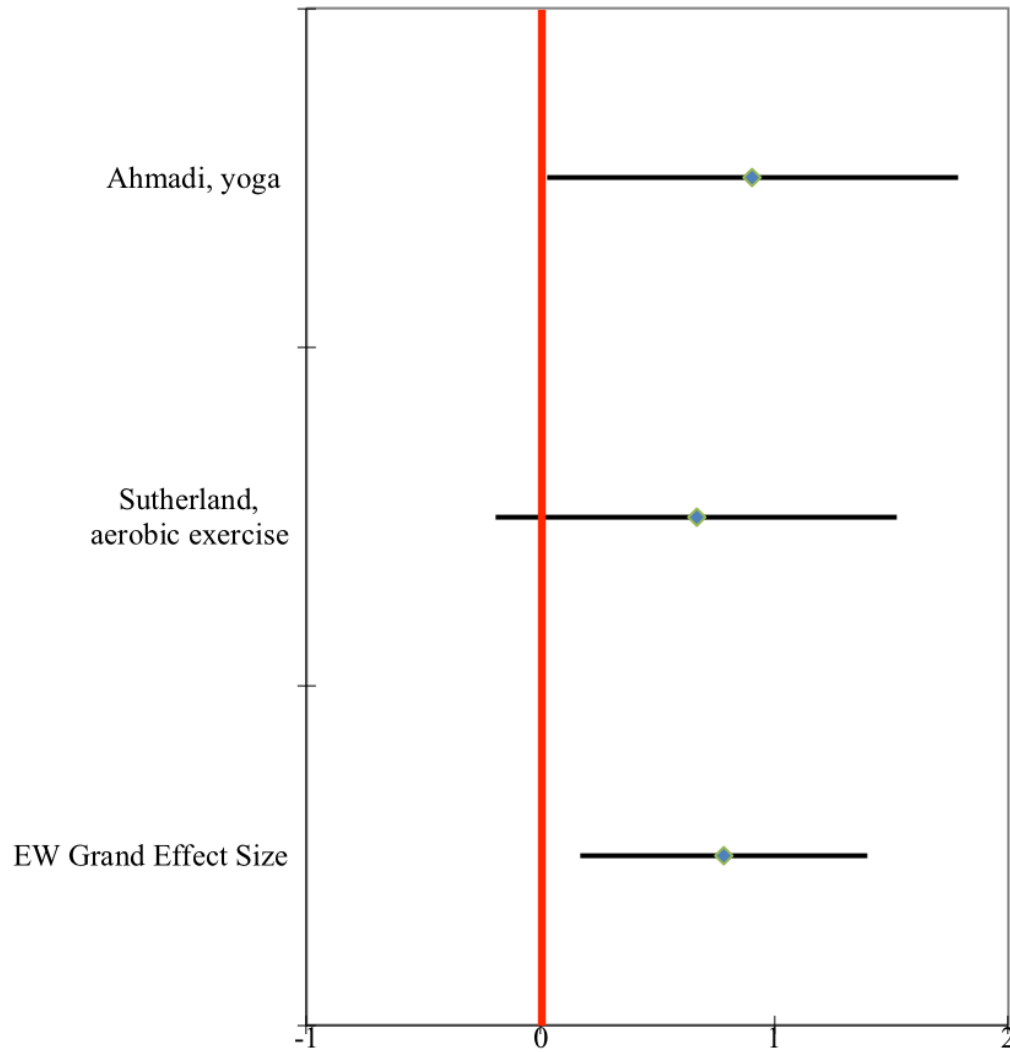

Within-group analyses for A) sexual function, B) sexual satisfaction, and C) emotional well-being with individual effect sizes, 95% CIs and grand effect sizes.

Abbreviations: **CVSD**: clitoral vacuum suction device, **EW**: Emotional well-being, **NMES**: neuromuscular electrical stimulation, **PFMT**: pelvic floor muscle training, **SF**: sexual function, **SS**: sexual satisfaction, **TTNS**: transcutaneous tibial nerve stimulation, **V**: vibratory stimulation

**Figure S2. Forest plot of between-group individual and grand effects with 95% confidence intervals for A) sexual function, B) sexual satisfaction, and C) emotional well-being**

A)

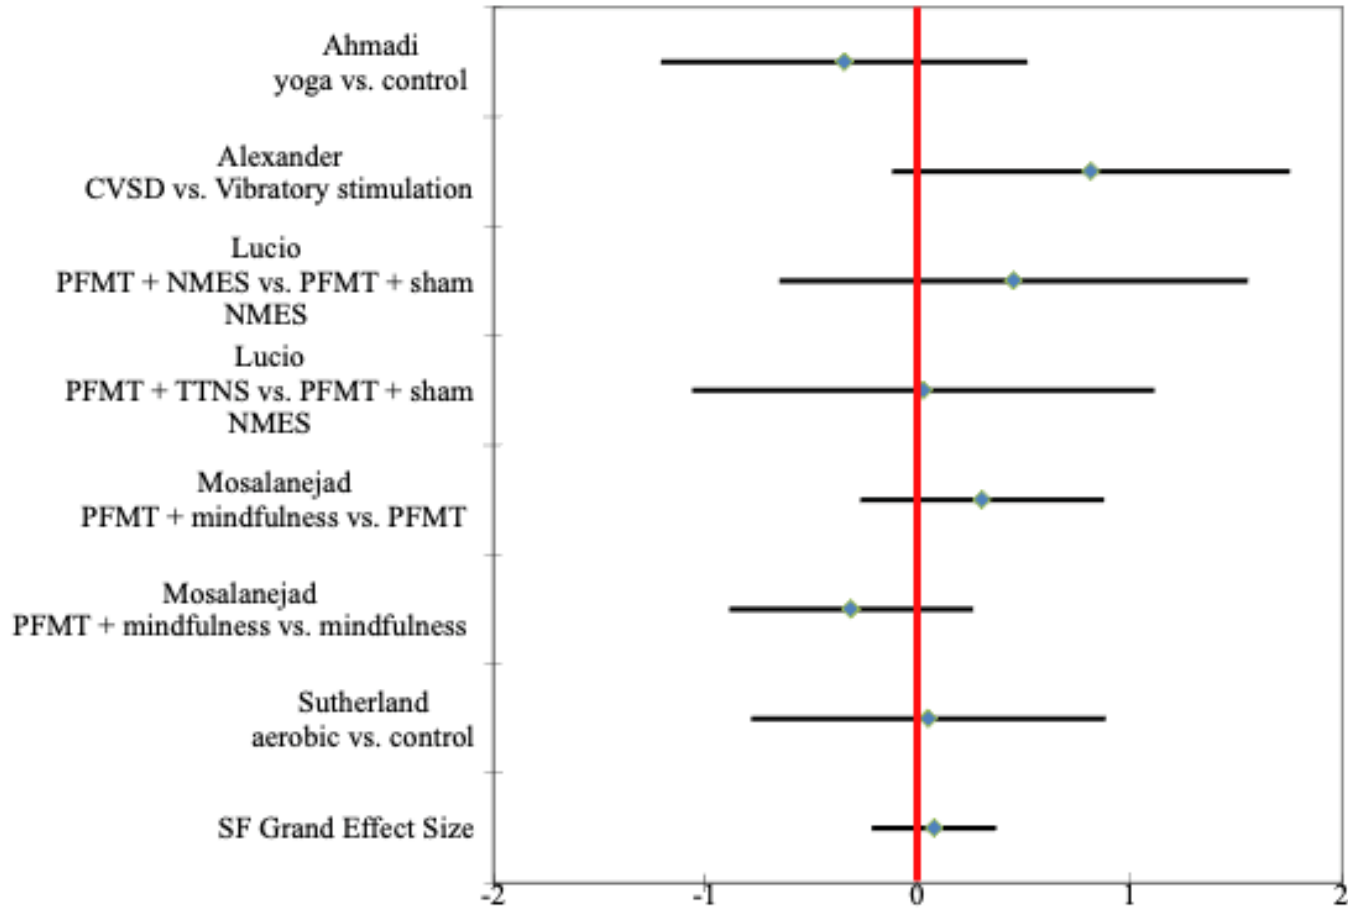

B)

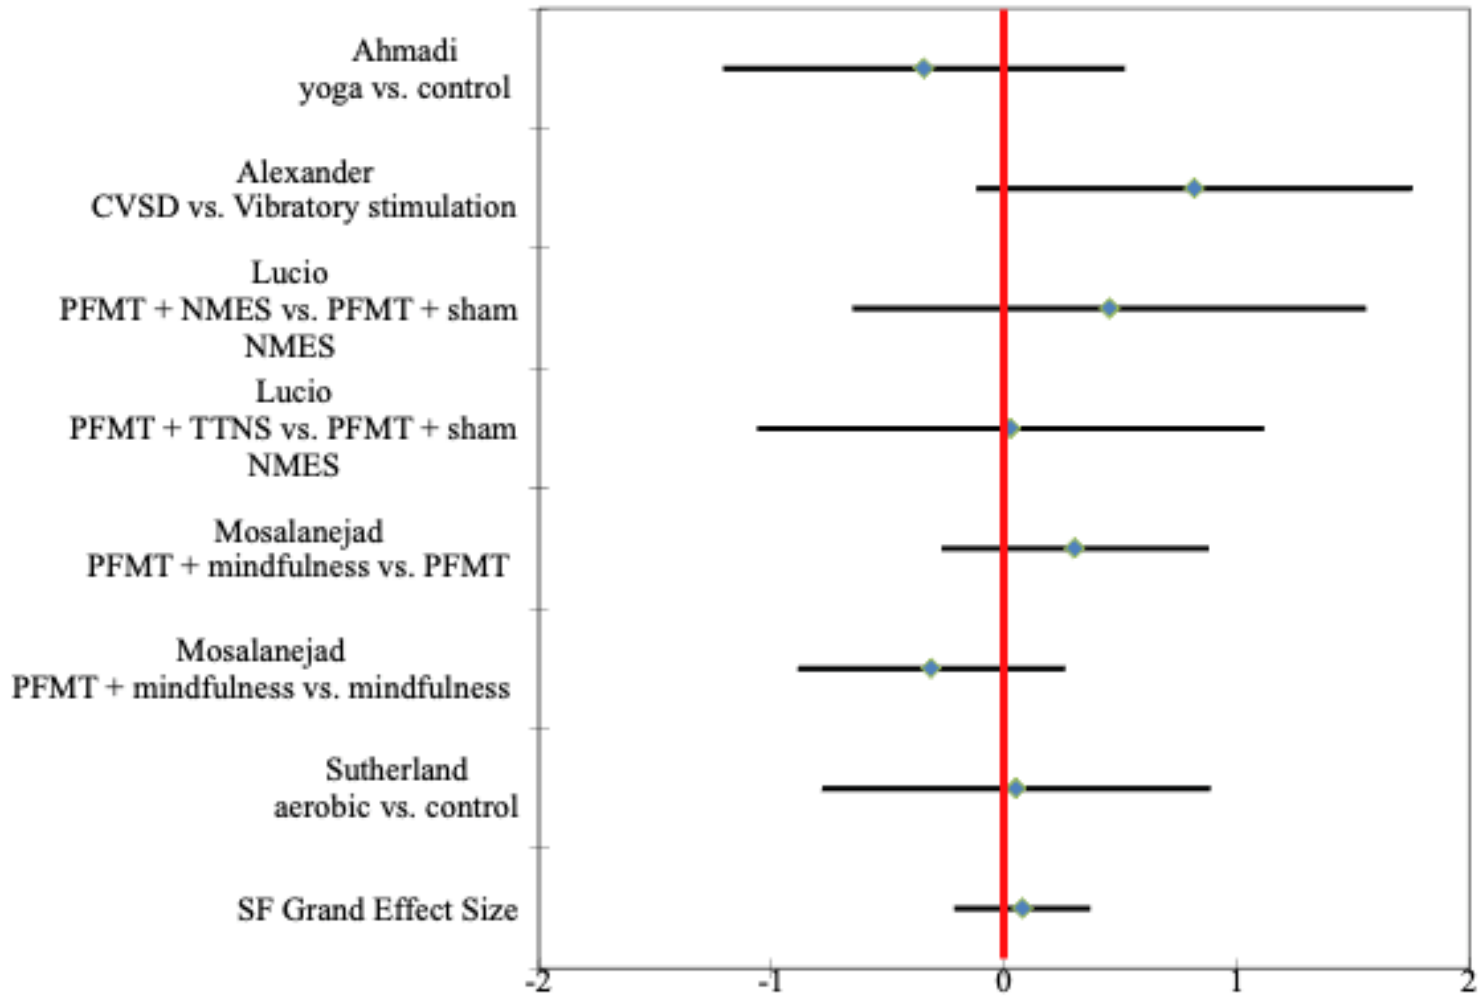

C)

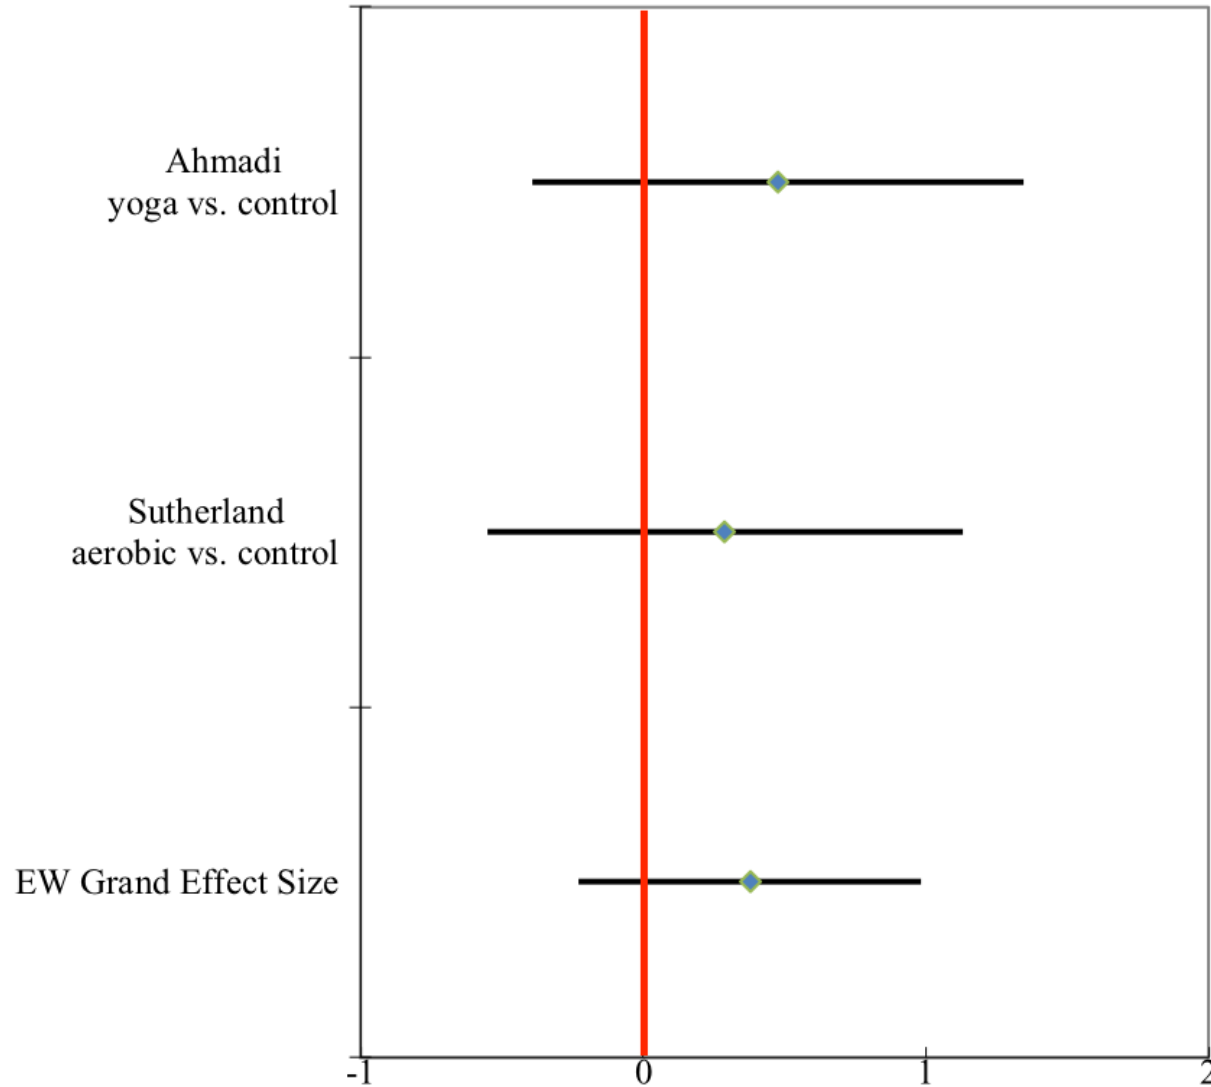

Between-group analyses for A) sexual function, B) sexual satisfaction, and C) emotional well-being with individual effect sizes, 95% CIs and grand effect sizes. Abbreviations: **CVSD**: clitoral vacuum suction device, **EW**: Emotional well-being, **NMES**: neuromuscular electrical stimulation, **PFMT**: pelvic floor muscle training, **SF**: sexual function, **SS**: sexual satisfaction, **TTNS**: transcutaneous tibial nerve stimulation, **V**: vibratory stimulation
